# Supplementary material
Source: PubMed Central journal article supplement (PMC2688998)
Supplement: 0901505106_0901505106SI.pdf [file 0901505106_0901505106SI.pdf]

# Supporting Information

Therapontos et al. 10.1073/pnas.0901505106

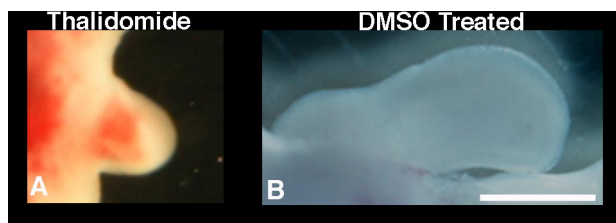

**Fig. S1.** Thalidomide induces severe defects in chick embryos. (A) Application of whole Thalidomide (50  $\mu$ g) (Sigma) induces severe limb outgrowth failure, when compared with a (B) DMSO treated limb (HHst28). (Scale bar, 750  $\mu$ m.)

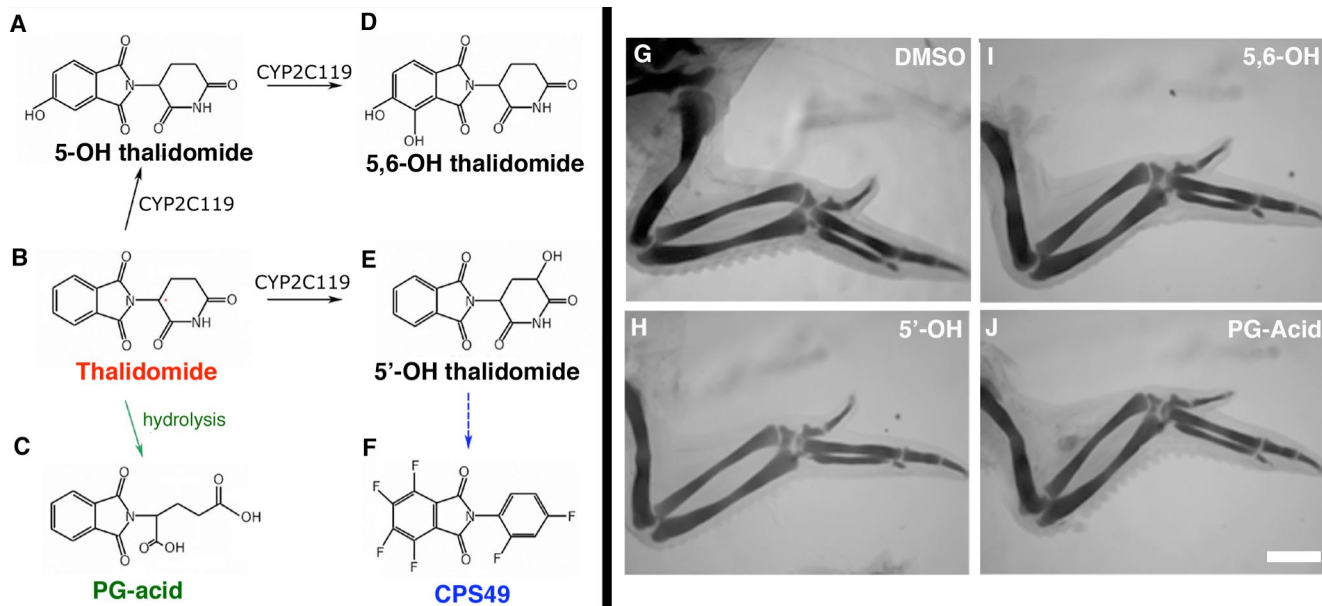

**Fig. S2.** (A–F) Schematic drawings of thalidomide metabolism, hydrolysis products, and analogues. Structure of thalidomide (B, chiral centre denoted by asterisk) gives rise to 5-OH thalidomide (A), 5,6'-OH thalidomide (D), and 5'-OH thalidomide (E) through metabolism by cytochrome P450 enzymes (CYP2C19). PG-Acid (C) is a hydrolysis product, whereas CPS49 (F) is a tetrafluorinated thalidomide analogue (based on 5'-OH thalidomide). Diagrams were adapted from refs. 1 and 2. (G–J) Nonantiangiogenic metabolites of thalidomide have no effect on limb development. Day 10 cartilage patterns of chick embryos treated at HH St18 with DMSO (G) or 800  $\mu\text{g}/\text{mL}$  of 5,6-OH thalidomide (I), 5'-OH-thalidomide (H), and PG Acid (J). No effect on limb development or pattern was observed. (Scale bar, 1,000  $\mu\text{m}$ .)

1. Franks ME, MacPherson GR, Figg WD (2004) Thalidomide. *Lancet* 363:1802–1811.

2. Lepper ER, Smith NF, Cox MC, Scripture CD, Figg WD (2006) Thalidomide metabolism and hydrolysis: Mechanisms and implications. *Curr Drug Metab* 7:677–685.

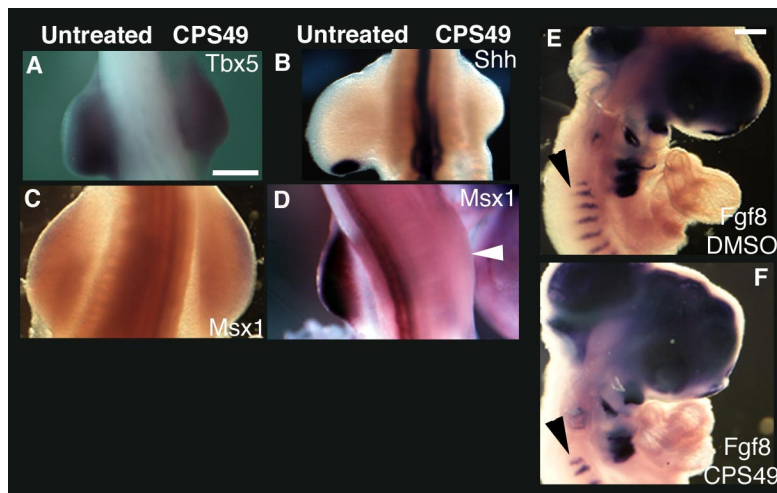

**Fig. S3.** Expression of signaling molecules in CPS49-treated embryos. Shown is wholemount in situ hybridization of embryos after treatment with CPS49 at HH St18 and fixed at 6 h (C) or 24 h (A, B, D, E, and F). (A) *Tbx5* expression remains comparable with control. (B) *Shh* expression is gone by 24 h. *Msx1* expression is present at 6 h (C) but undetectable after 24 h (D, white arrowhead). (A–D) Treated limb on right, untreated limb on left. (E) *Fgf8* expression is normal in the head and somites after 24-h treatment compared with DMSO control (E). (F) *Fgf8* expression is normal in the head and somites after 24-h treatment compared with DMSO control (E). (E and F) Arrowheads indicate normal somite expression of *Fgf8*, highlighting that CPS49 is not directly targeting gene expression. (Scale bars: A–D, 400  $\mu\text{m}$ ; E and F, 350  $\mu\text{m}$ .)



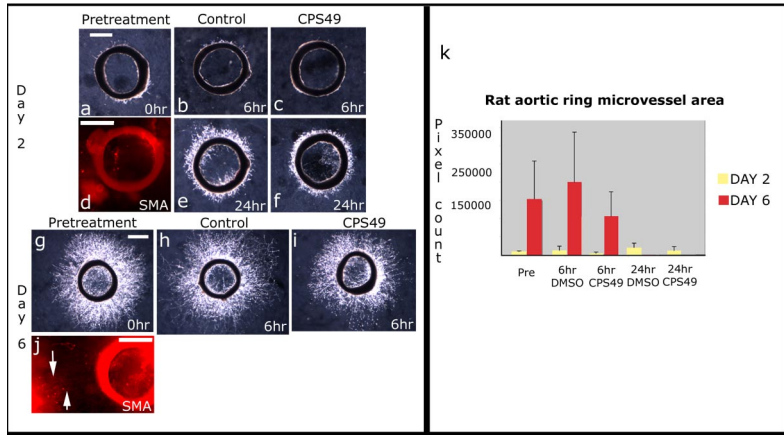

**Fig. S5.** CPS49 targets angiogenic blood vessels. Shown are rat aortic rings cultured for 2 D.I.V. (a–f) or 6 D.I.V. (g–j) before treatment with DMSO (b, e, and h) or PS49 (c, f, and i) and fixed 6 h (b, c, h, and i) or 24 h (e and f) posttreatment. (d and j) After 6 D.I.V., but not 2 D.I.V., vessels are smooth-muscle-actin positive (white arrows). (b, c, e, f, h, and i) Treatment with CPS49 after 2 D.I.V., but not 6 D.I.V., significantly decreased vessel density and number. (k) Mean ± SEM microvessel area of cultures treated after 2 D.I.V. (yellow bars) or 6 D.I.V. (red bars). Aortic ring cultures were carried out as described in ref. 1. (Scale bars: 1,000 μm.)

1. Zhu W-H, Nicosia RF (2002) The thin prep rat aortic ring assay: A modified method for the characterization of angiogenesis in whole mounts. *Angiogenesis* 5:81–86.

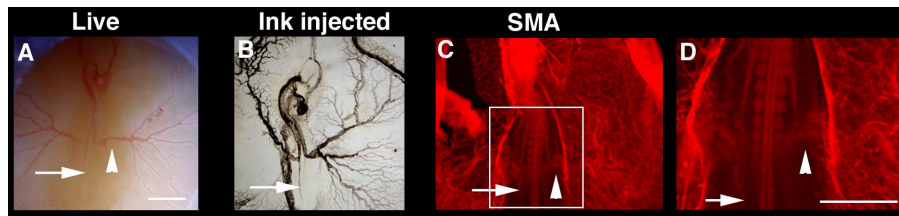

**Fig. S6.** Blood vessels in HHst15 embryos are immature and susceptible to CPS49. Visualization of blood vessels (A and B) and their maturity through alpha-smooth muscle actin wholemount antibody staining (C and D) in HHst15 chicken embryo. (A) Live image of embryo. (B) Ink-injected embryo, highlighting vascular network. (C) Antibody-stained embryo highlighting that embryonic vessels are alpha-smooth-muscle negative (white box is shown at higher magnification in D). (A–D) White arrow indicates embryonic vein, which is alpha-smooth-muscle-actin negative (C and D). White arrowhead indicates vitelline artery, which is alpha-smooth-muscle positive (C and D). (Scale bars: A–D, 250  $\mu$ m.)

Table S1. Effect of CPS49 on microvessel number in mouse aortic ring cultures after incubation with vehicle or 10  $\mu\text{g}/\text{mL}$  CPS49

|                     | time 0         | 6 h            |                | 24 h           |                |
|---------------------|----------------|----------------|----------------|----------------|----------------|
|                     | WT             | control        | CPS49          | control        | CPS49          |
| 2 D.I.V.            |                |                |                |                |                |
| Neovessel number    | 67.7 $\pm$ 5.7 | 72.5 $\pm$ 6.9 | 31.1 $\pm$ 4.5 | 93.4 $\pm$ 9.3 | 56.5 $\pm$ 5.8 |
| <i>n</i> (cultures) | 10             | 15             | 15             | 15             | 15             |
| 5 D.I.V.            |                |                |                |                |                |
| Neovessel number    | 49.4 $\pm$ 6.0 | 70.8 $\pm$ 9.4 | 52 $\pm$ 5.7   | 56.2 $\pm$ 6.8 | 44.1 $\pm$ 9.2 |
| <i>n</i> (cultures) | 7              | 12             | 12             | 12             | 12             |

Neovessel number = mean  $\pm$  SEM microvessel count of day 2 and day 5 cultures.
